# Supplementary material for: Total synthesis of (±)-aspercyclide A and its C19 methyl ether
Source: Royal Society of Chemistry journal article supplement (doi:10.1039/b923528k), 2009-12-23
Supplement: b923528k.pdf [file b923528k.pdf]

## Total Synthesis of (±)-Aspercyclide A and its C19 Methyl Ether

James L. Carr,<sup>a</sup> Daniel A. Offermann,<sup>a</sup> Mary D. Holdom,<sup>b</sup> Philip Dusart,<sup>b</sup> Andrew J. P. White,<sup>a</sup> Andrew J. Beavil,<sup>b</sup> Robin J. Leatherbarrow,<sup>a</sup> Stephen D. Lindell,<sup>c</sup> Brian J. Sutton<sup>b</sup> and Alan C. Spivey<sup>a\*</sup>

<sup>a</sup>*Department of Chemistry, South Kensington campus, Imperial College, London, SW7 2AZ, UK*

<sup>b</sup>*King's College London, The Randall Division of Cell & Molecular Biophysics, New Hunt's House, Guy's Hospital Campus, London SE1 1UL, UK*

<sup>c</sup>*BayerCropScience AG, Industriepark Höchst G836, Frankfurt-am-Mein, D-65926, Germany*

### Supporting Information — X-Ray Crystallography

*Crystal data for 7a:* C<sub>18</sub>H<sub>25</sub>BrO<sub>3</sub>, *M* = 369.29, monoclinic, *P*2<sub>1</sub>/*c* (no. 14), *a* = 7.80269(5), *b* = 14.86805(8), *c* = 15.69840(8) Å, β = 92.5603(5)°, *V* = 1819.37(2) Å<sup>3</sup>, *Z* = 4, *D*<sub>c</sub> = 1.348 g cm<sup>-3</sup>, μ(Cu-Kα) = 3.154 mm<sup>-1</sup>, *T* = 173 K, colourless plates, Oxford Diffraction Xcalibur PX Ultra diffractometer; 3516 independent measured reflections (*R*<sub>int</sub> = 0.0294), *F*<sup>2</sup> refinement, *R*<sub>1</sub>(obs) = 0.0255, *wR*<sub>2</sub>(all) = 0.0761, 2910 independent observed absorption-corrected reflections [*|F*<sub>o</sub>| > 4σ(*|F*<sub>o</sub>)], 2θ<sub>max</sub> = 143°, 201 parameters. CCDC 747554.

*Crystal data for the benzoate ester of 8:* C<sub>17</sub>H<sub>15</sub>BrO<sub>4</sub>, *M* = 363.20, monoclinic, *Pn* (no. 7), *a* = 8.02056(13), *b* = 6.60200(9), *c* = 14.6738(2) Å, β = 95.5928(15)°, *V* = 773.31(2) Å<sup>3</sup>, *Z* = 2, *D*<sub>c</sub> = 1.560 g cm<sup>-3</sup>, μ(Cu-Kα) = 3.764 mm<sup>-1</sup>, *T* = 173 K, colourless blocks, Oxford Diffraction Xcalibur PX Ultra diffractometer; 2700 independent measured reflections (*R*<sub>int</sub> = 0.0173), *F*<sup>2</sup> refinement, *R*<sub>1</sub>(obs) = 0.0254, *wR*<sub>2</sub>(all) = 0.0724, 2634 independent observed absorption-corrected reflections [*|F*<sub>o</sub>| > 4σ(*|F*<sub>o</sub>)], 2θ<sub>max</sub> = 143°, 200 parameters. The absolute structure of the benzoate of **8** was determined by a combination of *R*-factor tests [*R*<sub>1</sub><sup>+</sup> = 0.0254, *R*<sub>1</sub><sup>-</sup> = 0.0352] and by use of the Flack parameter [*x*<sup>+</sup> = +0.00(2), *x*<sup>-</sup> = +1.01(2)]. CCDC 747376.

*Crystal data for 15a:* C<sub>25</sub>H<sub>28</sub>O<sub>6</sub>, *M* = 424.47, monoclinic, *P*2<sub>1</sub>/*c* (no. 14), *a* = 18.7407(3), *b* = 8.56319(13), *c* = 13.73354(18) Å, β = 93.1039(14)°, *V* = 2200.73(6) Å<sup>3</sup>, *Z* = 4, *D*<sub>c</sub> = 1.281 g cm<sup>-3</sup>, μ(Cu-Kα) = 0.743 mm<sup>-1</sup>, *T* = 173 K, colourless canoe-shaped plates, Oxford Diffraction Xcalibur PX Ultra diffractometer; 4188 independent measured reflections (*R*<sub>int</sub> =

0.0202),  $F^2$  refinement,  $R_1(\text{obs}) = 0.0429$ ,  $wR_2(\text{all}) = 0.1214$ , 3114 independent observed absorption-corrected reflections [ $|F_o| > 4\sigma(|F_o|)$ ,  $2\theta_{\text{max}} = 143^\circ$ ], 285 parameters. CCDC 747377.

The O(21)-bound hydrogen atom in the structure of **15a** was located from a  $\Delta F$  map and refined freely subject to an O–H distance constraint of 0.90 Å. The O(21)–H $\cdots$ O(22) hydrogen bond has O $\cdots$ O and H $\cdots$ O separations of 2.613(2) and 1.80 Å respectively, with an O–H $\cdots$ O angle of 150°.

**Fig. S1** The molecular structure of **7a**.

**Fig. S2** The molecular structure of **7a** (50% probability ellipsoids).

**Fig. S3** The molecular structure of the benzoate ester of **8**.

**Fig. S4** The molecular structure of the benzoate ester of **8** (50% probability ellipsoids).

**Fig. S5** The molecular structure of **15a** (50% probability ellipsoids).

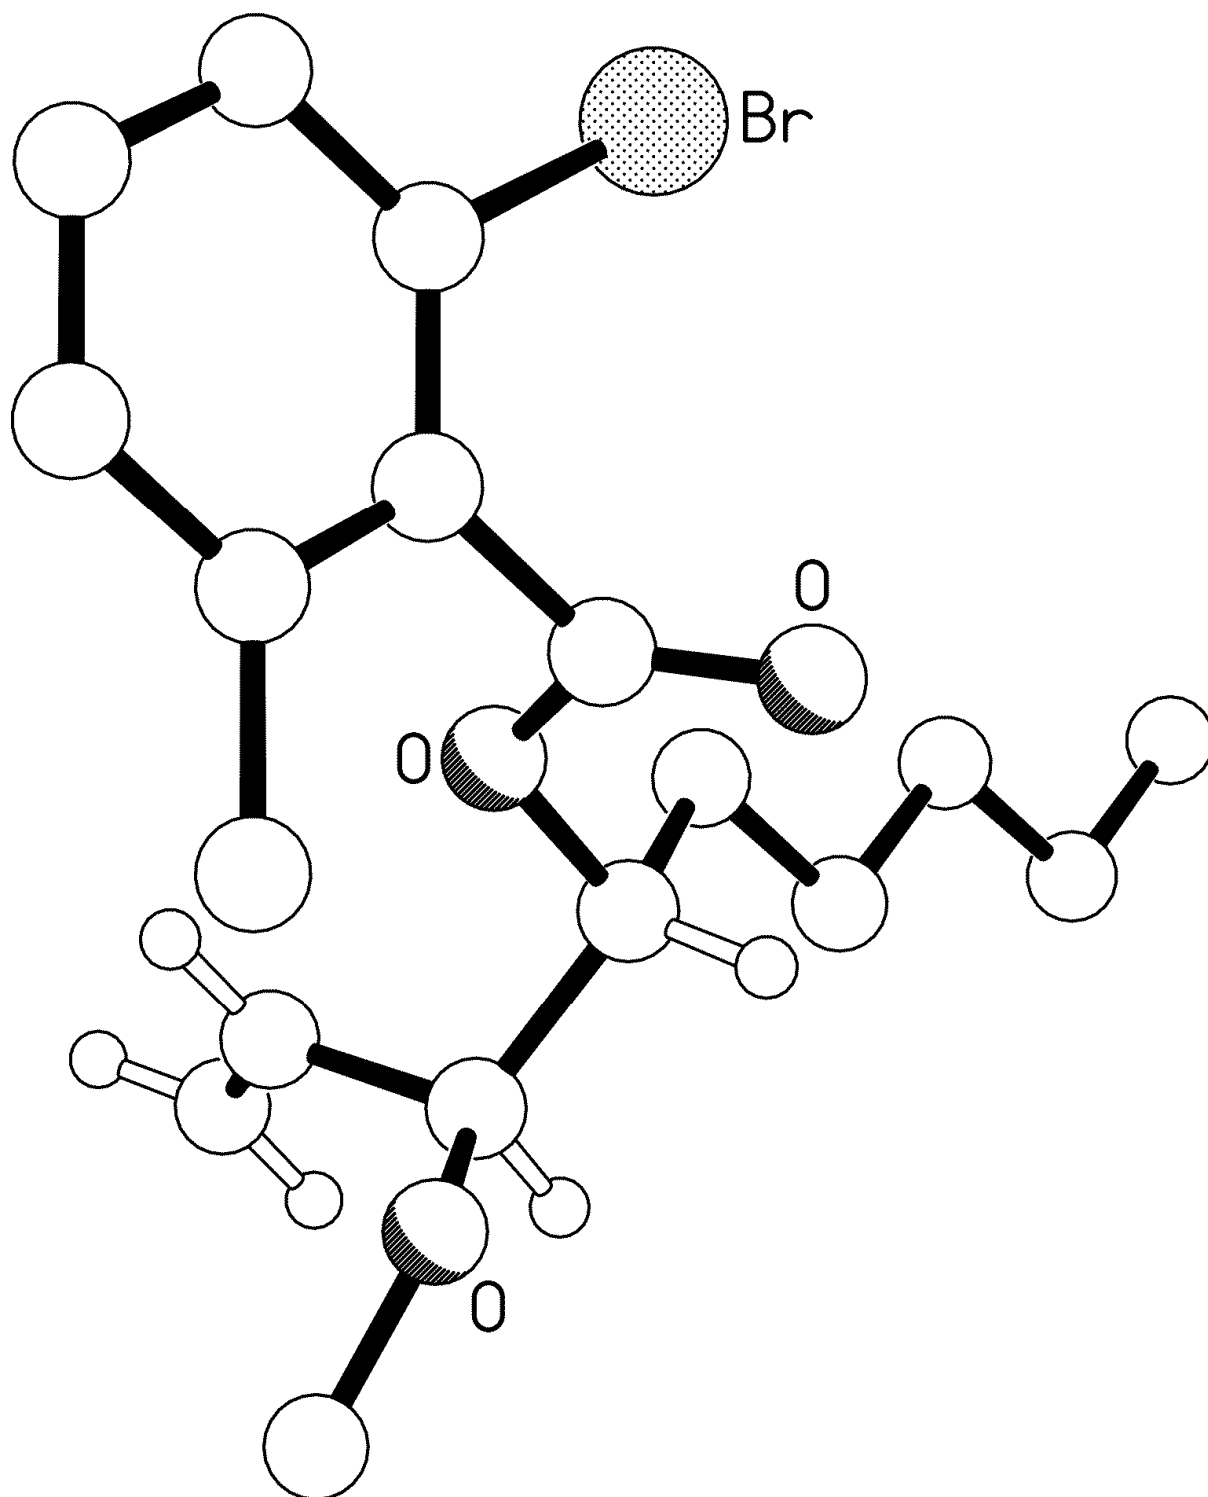

Fig. S1

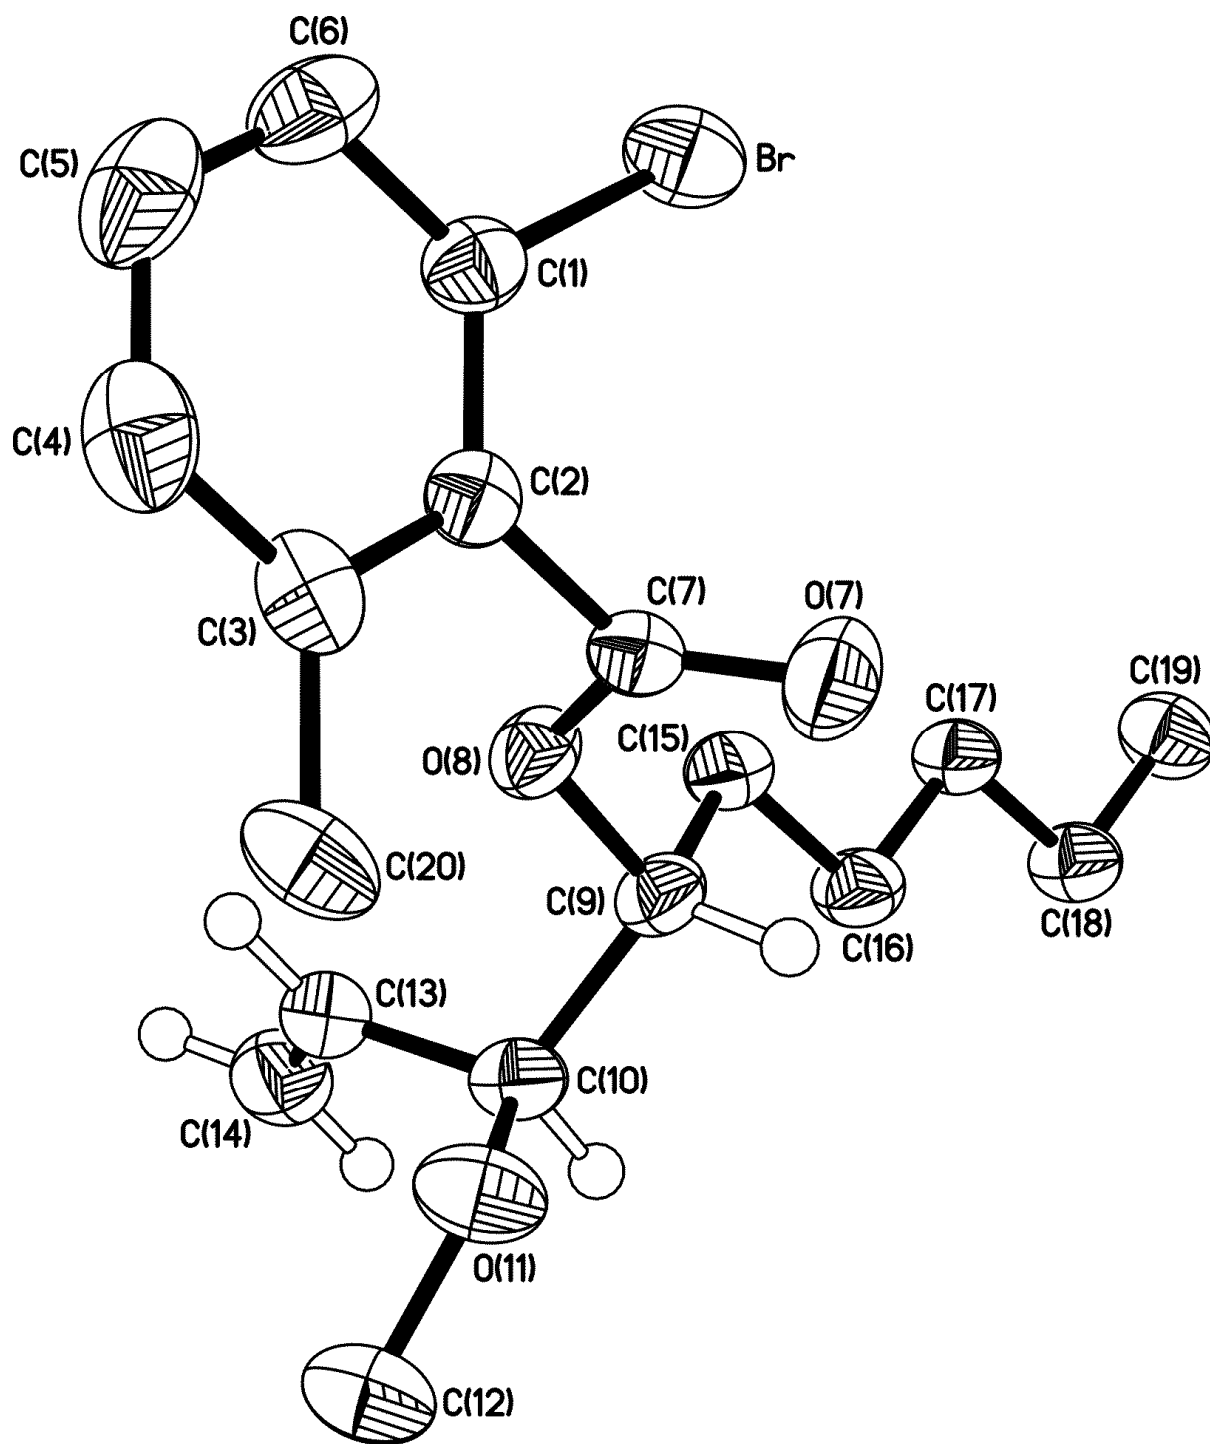

Fig. S2

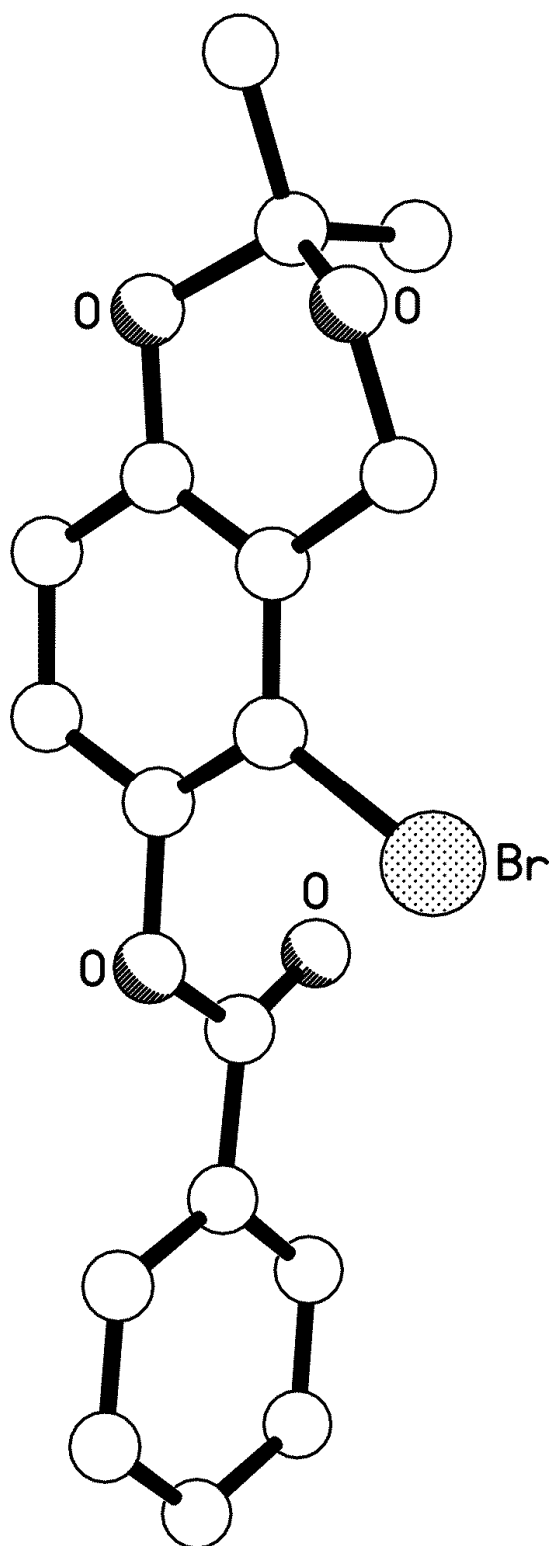

Fig. S3

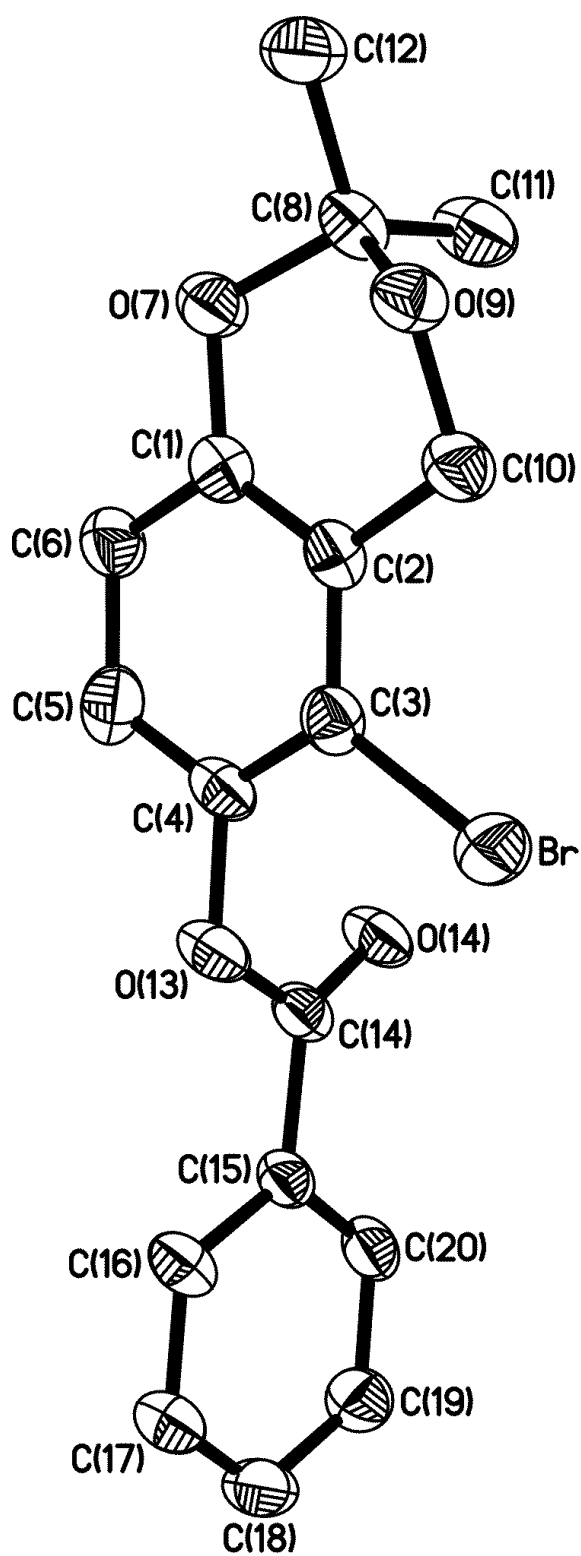

Fig. S4

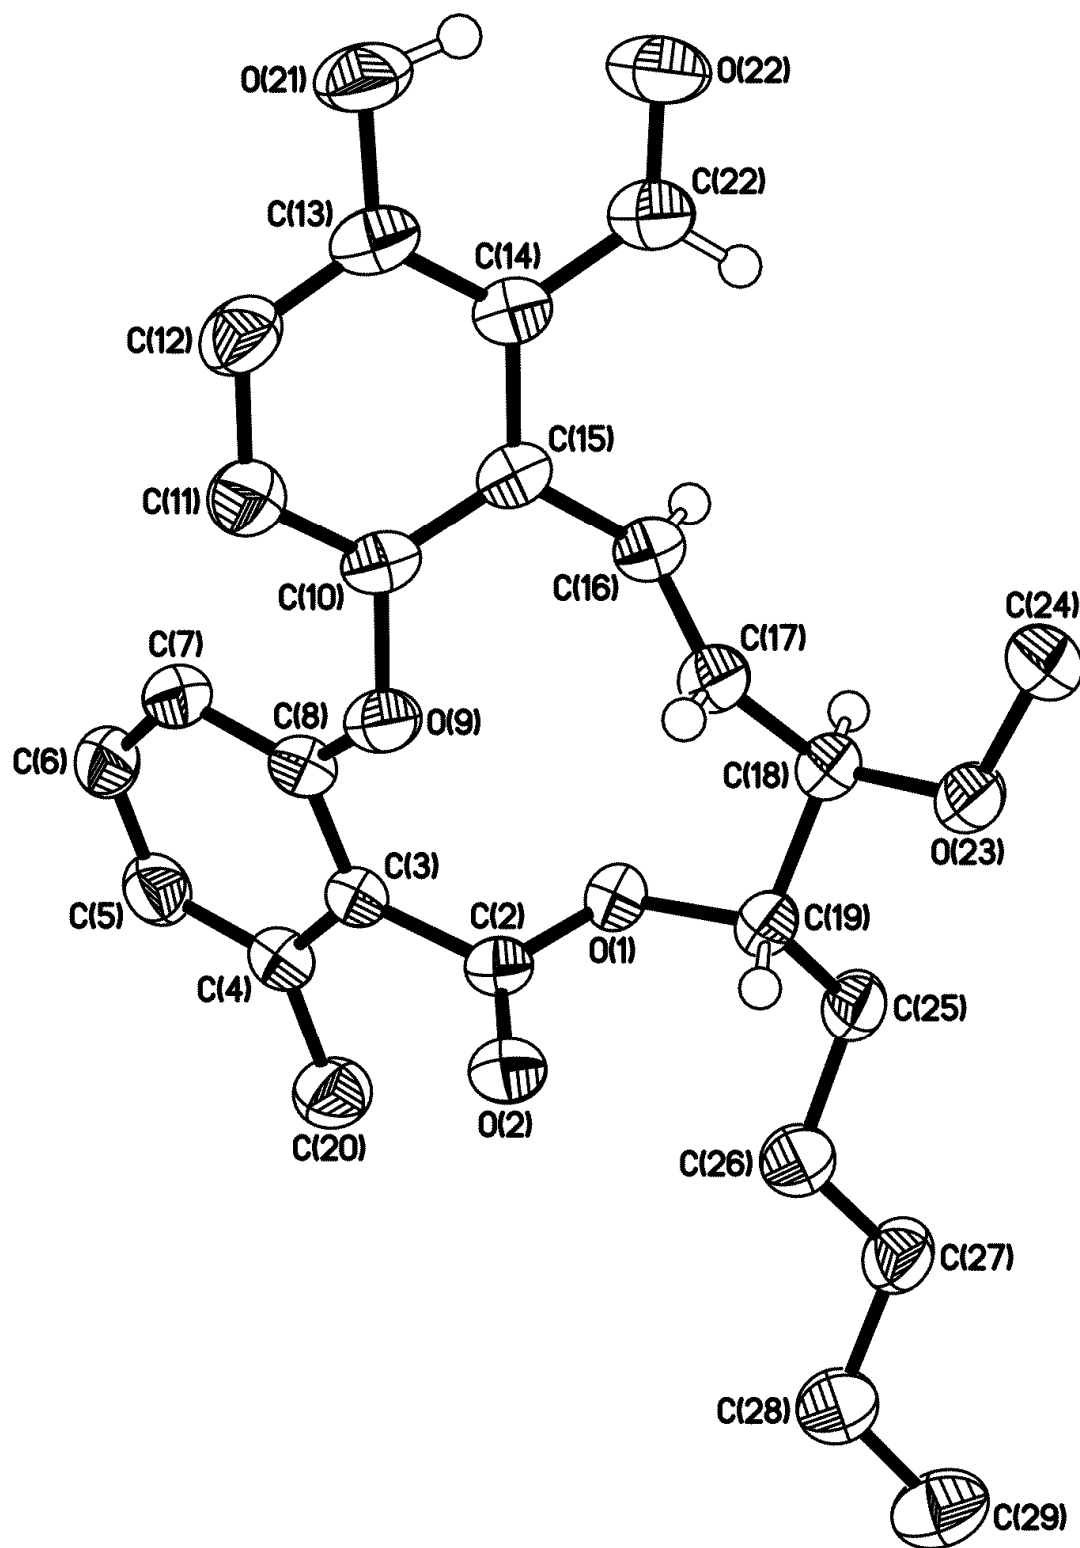

Fig. S5
